# Supplementary material for: Nucleation and growth mechanism in the early stages of nickel coating in jet electrodeposition: a coarse-grained molecular simulation and experimental study
Source: Royal Society of Chemistry journal article supplement (doi:10.1039/d1ra08926a), 2022-01-01
Supplement: d1ra08926a1.pdf [file d1ra08926a1.pdf]

## Supporting Information

### **Nucleation and Growth Mechanism in Early Stages of Nickel Coating in Jet Electrodeposition: A Coarse-grained Molecular Simulation and Experimental Study**

Fan Zhang,<sup>†a</sup> Shenggui Liu<sup>†b</sup> and Fei Wang<sup>\*a</sup>

<sup>a</sup> School of mechanical and automotive engineering, Qingdao University of Technology, Qingdao 26652, P. R. China.

<sup>b</sup> School of mechanical and engineering, Beijing Institute of Technology, Beijing 100081, P R China.

<sup>†</sup> These authors contributed equally to this work and should be considered as the co-first authors.

<sup>\*</sup>Corresponding author. Email: wangfql@163.com (Fei Wang).

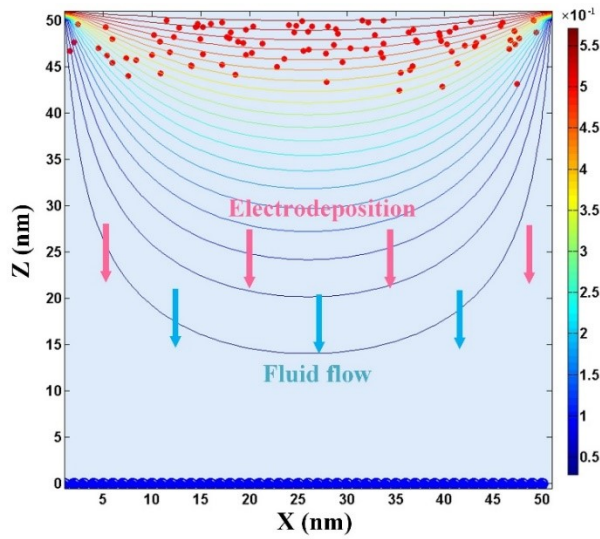

Figure S1. The coarse-grained molecular dynamic model under applied electric potential and flow field.

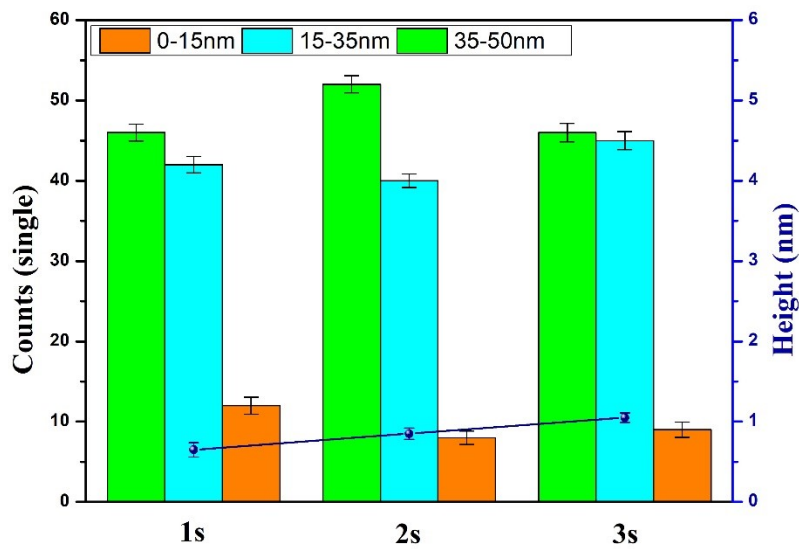

Figure S2. The data statistics of deposition morphology with time in traditional electrodeposition with the potential of 0.1V.

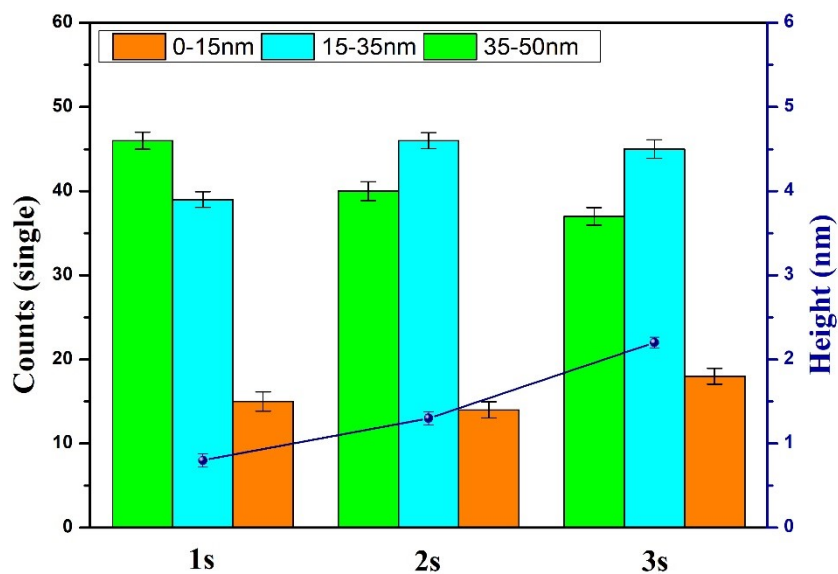

Figure S3. The data statistics of deposition morphology with time in vertical electrodeposition with the potential of 0.5V.

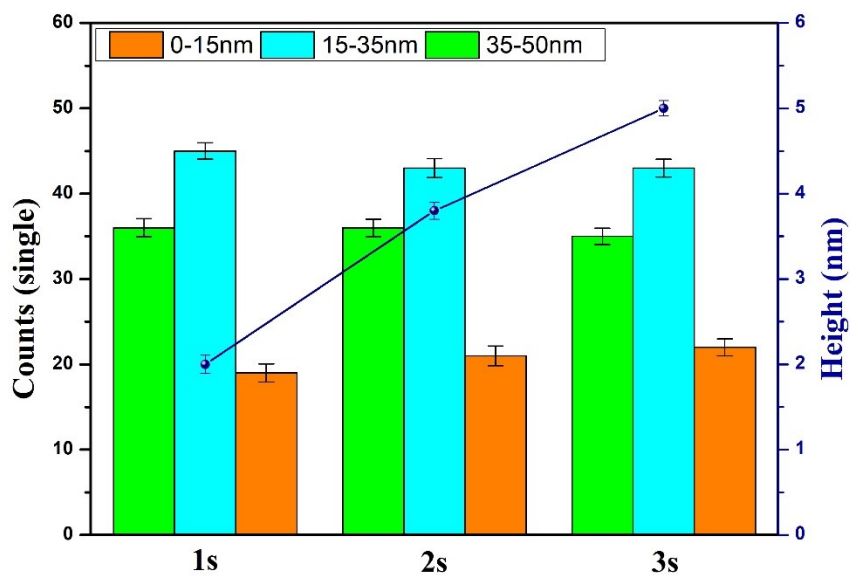

Figure S4. The data statistics of deposition morphology with time in jet electrodeposition with the potential of 0.5V.

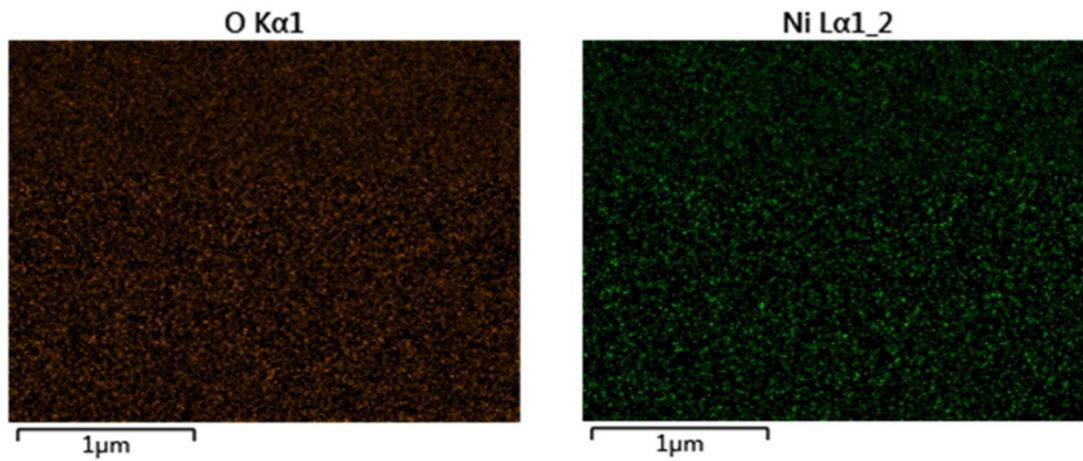

Figure S5. EDS mapping for traditional electrodeposition.

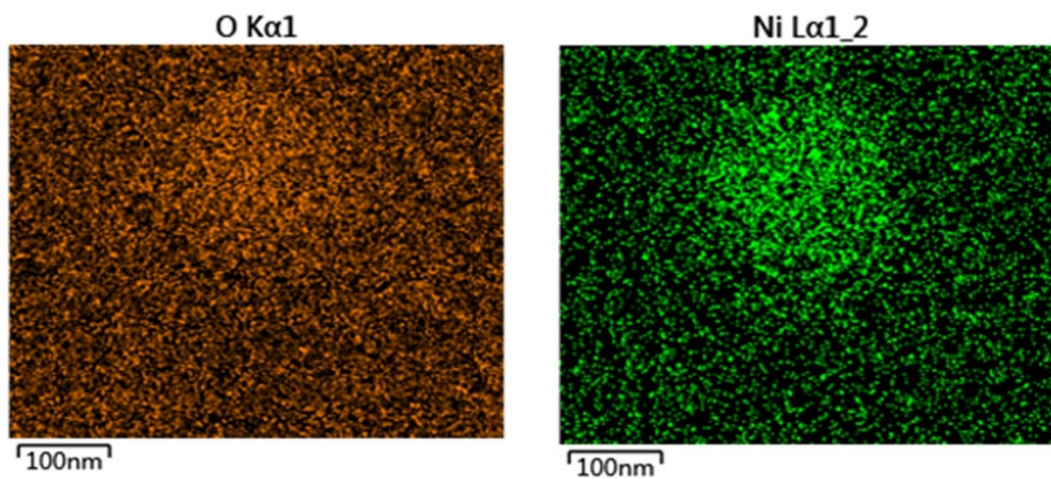

Figure S6. EDS mapping for vertical electrodeposition.

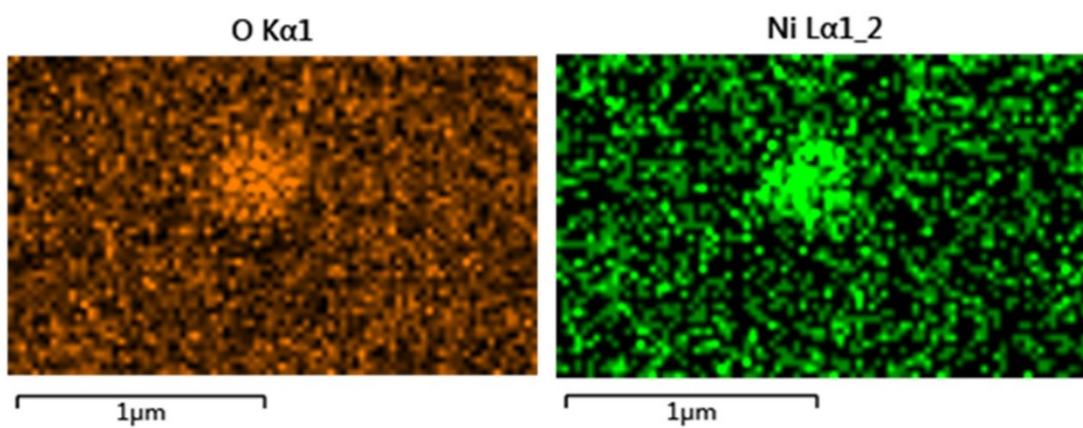

Figure S7. EDS mapping for jet electrodeposition.
